# Supplementary material for: Lysine-36 of Drosophila histone H3.3 supports adult longevity
Source: PubMed Central journal article supplement — bioRxiv. 2023 Dec 13:2023.09.28.559962. Preprint. [Version 2] doi: 10.1101/2023.09.28.559962 (PMC10775331; doi:10.1101/2023.09.28.559962), 2023-12-13
Supplement: media-1.pdf [file media-1.pdf]

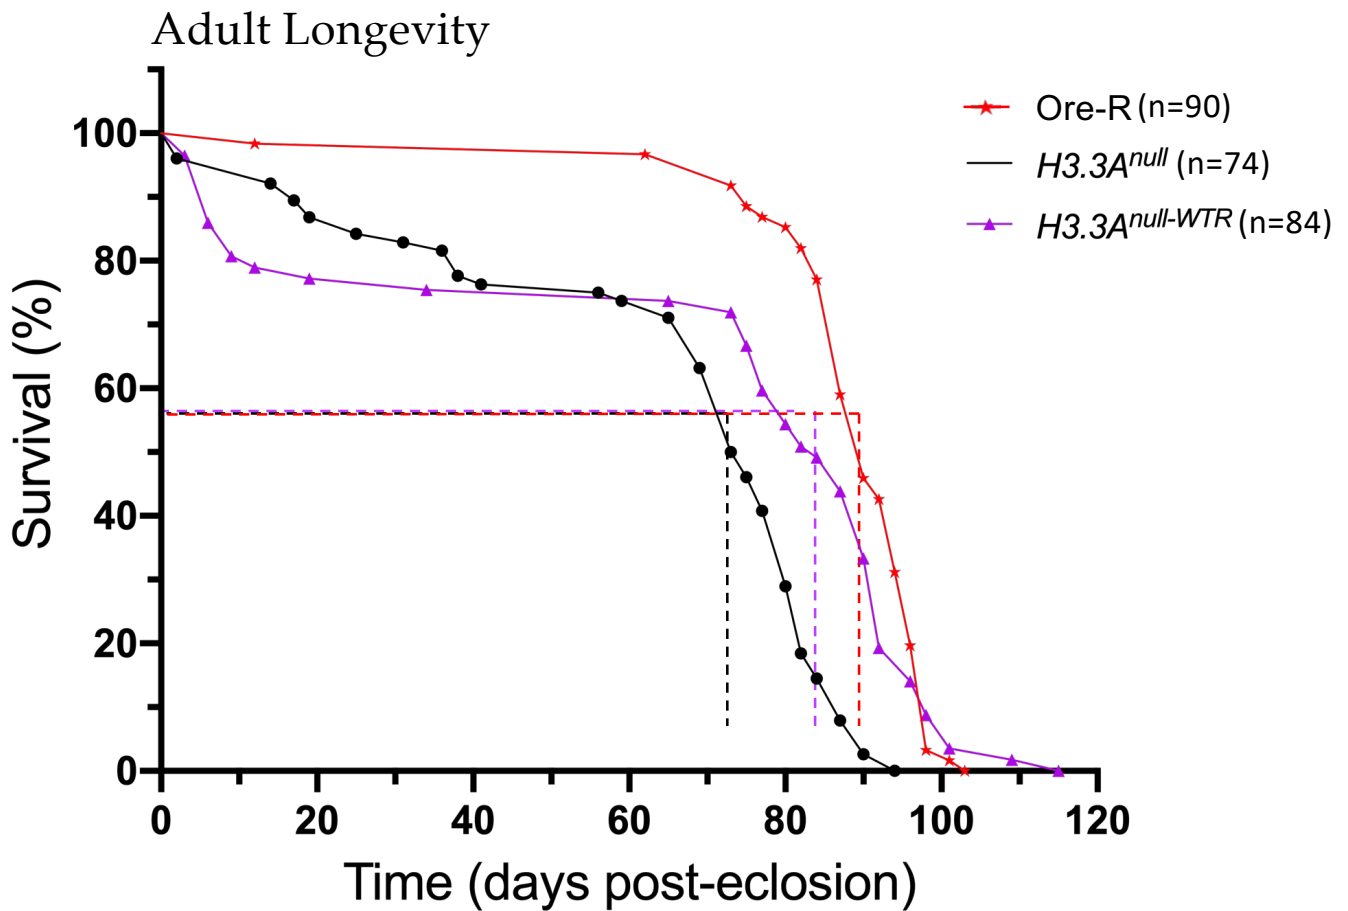

|                                 | Ore-R                    | <i>H3.3A<sup>null</sup></i> | <i>H3.3A<sup>null-WTR</sup></i> |
|---------------------------------|--------------------------|-----------------------------|---------------------------------|
| Ore-R                           | ---                      | $< 10^{-6}$ ****            | $< 4.3 \times 10^{-3}$ *        |
| <i>H3.3A<sup>null</sup></i>     | $< 10^{-6}$ ****         | ---                         | $< 4.2 \times 10^{-3}$ *        |
| <i>H3.3A<sup>null-WTR</sup></i> | $< 4.3 \times 10^{-3}$ * | $< 4.2 \times 10^{-3}$ *    | ---                             |

**Figure S1. *H3.3A<sup>null</sup>* control animals are slightly less fit than Oregon-R wild type control animals.** Adult longevity assays for Oregon-R, *H3.3A<sup>null</sup>* and *H3.3A<sup>null-WTR</sup>* flies. Median lifespan was determined (dotted lines) by identifying the day at which 50% of the animals survived. Statistical comparison of survival curves using Gehan-Breslow-Wilcoxon tests are presented in the accompanying table. A Bonferroni correction for multiple comparisons was employed, resulting in the following adjusted significance values: \*  $p < 0.0167$ , \*\*  $p < 0.0034$ , \*\*\*  $p < 3.4 \times 10^{-4}$ , \*\*\*\*  $p < 3.4 \times 10^{-5}$ .

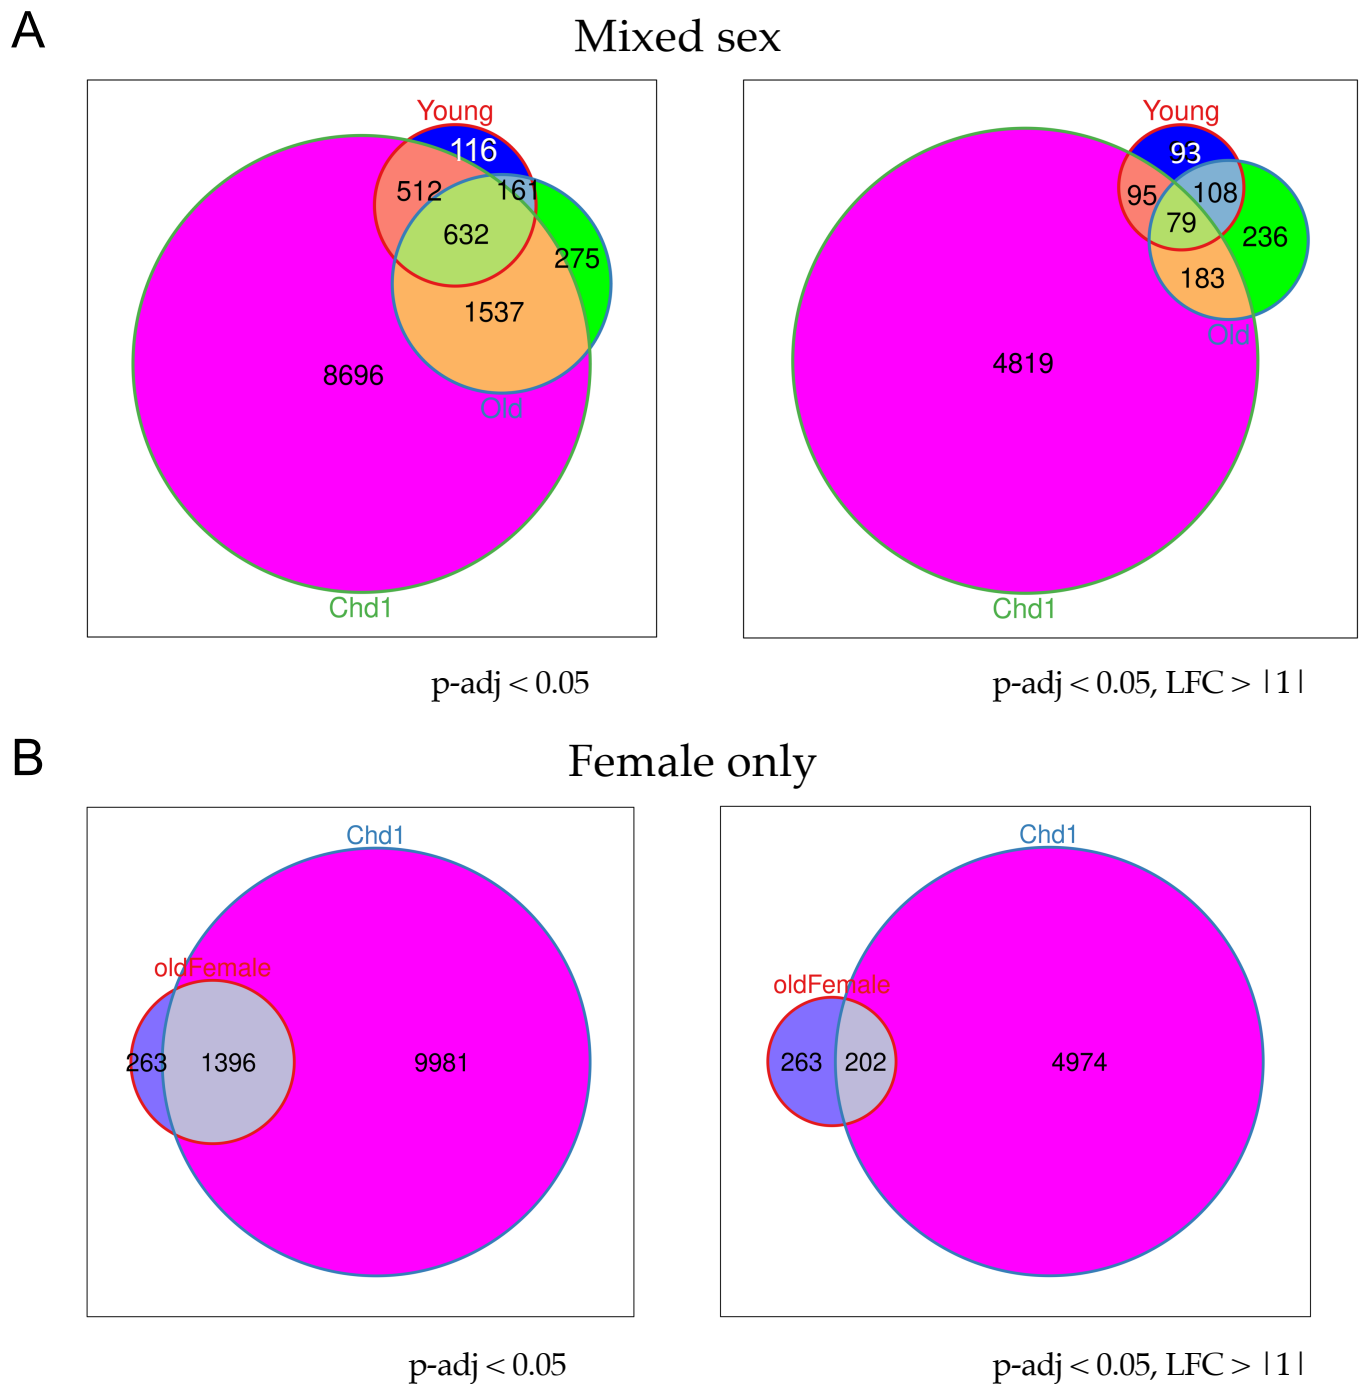

**Figure S2. Overlap of DEGs between *H3.3<sup>K36R</sup>* and *Chd1* mutants.** A) Venn diagrams of Young *H3.3<sup>K36R</sup>/*H3.3<sup>Anull</sup>**, Old *H3.3<sup>K36R</sup>/*H3.3<sup>Anull</sup>**, and *Chd1* /Control DEGs from our Mixed Sex (non-interaction) DESeq2 model (Figure 2) and the *Chd1* data reanalyzed with the same bioinformatic workflow. At left, genes with  $p\text{-adj} < 0.05$ ; at right, with an additional cutoff with  $LFC > |1|$ . B) Same as in A, except we performed DESeq2 analysis with sex as a variable, displaying DEGs from females only to more closely match the samples in the *Chd1* study.

# Adult Longevity

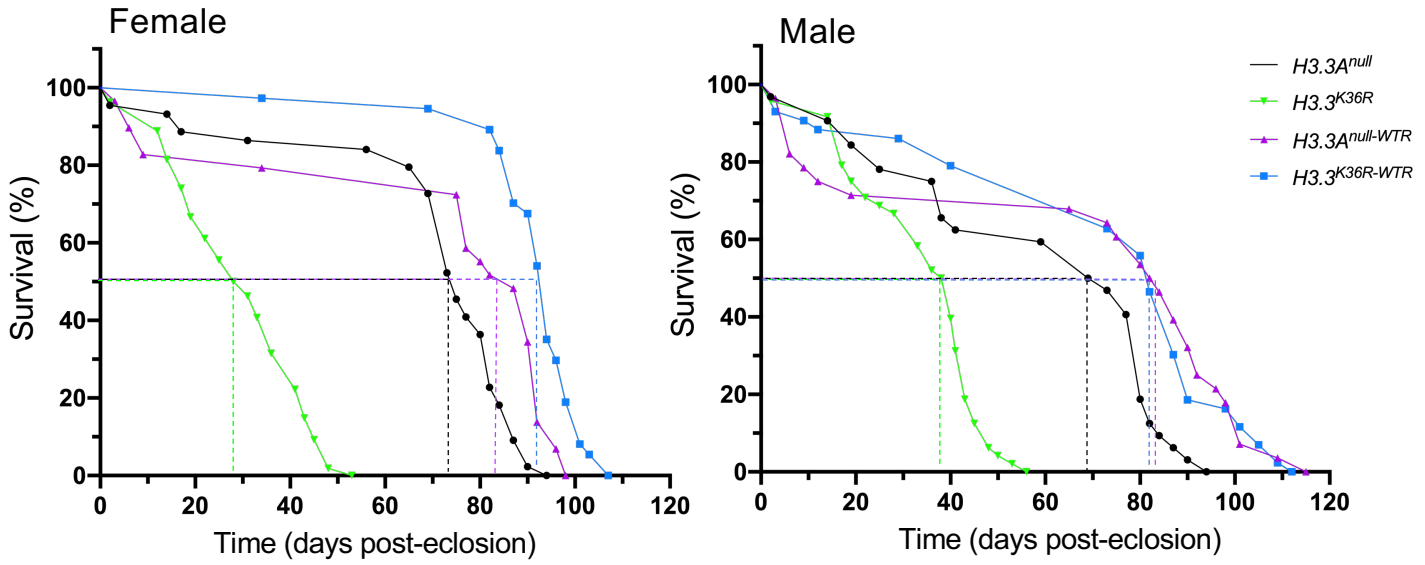

| Female                          | <i>H3.3A<sup>null</sup></i> | <i>H3.3<sup>K36R</sup></i> | <i>H3.3A<sup>null-WTR</sup></i>  | <i>H3.3<sup>K36R-WTR</sup></i>   |
|---------------------------------|-----------------------------|----------------------------|----------------------------------|----------------------------------|
| <i>H3.3A<sup>null</sup></i>     | ---                         | < 10 <sup>-6</sup><br>**** | ns                               | ---                              |
| <i>H3.3<sup>K36R</sup></i>      | < 10 <sup>-6</sup><br>****  | ---                        | ---                              | < 10 <sup>-6</sup><br>****       |
| <i>H3.3A<sup>null-WTR</sup></i> | ns                          | ---                        | ---                              | < 2.37 x 10 <sup>-4</sup><br>*** |
| <i>H3.3<sup>K36R-WTR</sup></i>  | ---                         | < 10 <sup>-6</sup><br>**** | < 2.37 x 10 <sup>-4</sup><br>*** | ---                              |

| Male                            | <i>H3.3A<sup>null</sup></i>      | <i>H3.3<sup>K36R</sup></i>       | <i>H3.3A<sup>null-WTR</sup></i> | <i>H3.3<sup>K36R-WTR</sup></i> |
|---------------------------------|----------------------------------|----------------------------------|---------------------------------|--------------------------------|
| <i>H3.3A<sup>null</sup></i>     | ---                              | < 2.37 x 10 <sup>-4</sup><br>*** | ns                              | ---                            |
| <i>H3.3<sup>K36R</sup></i>      | < 2.37 x 10 <sup>-4</sup><br>*** | ---                              | ---                             | < 10 <sup>-6</sup><br>****     |
| <i>H3.3A<sup>null-WTR</sup></i> | ns                               | ---                              | ---                             | ns                             |
| <i>H3.3<sup>K36R-WTR</sup></i>  | ---                              | < 10 <sup>-6</sup><br>****       | ns                              | ---                            |

**Figure S3.** Adult longevity assays for *H3.3A<sup>null</sup>* and *H3.3A<sup>null-WTR</sup>* controls, and for *H3.3<sup>K36R</sup>* and *H3.3<sup>K36R-WTR</sup>* flies, parsed by sex. Median lifespan was determined (dotted lines) by identifying the day at which 50% of the animals survived. Statistical comparison of survival curves using Gehan-Breslow-Wilcoxon tests are presented in the accompanying table. A Bonferroni correction for multiple comparisons was employed, resulting in the following adjusted significance values: \*  $p < 0.0125$ , \*\*  $p < 0.0025$ , \*\*\*  $p < 2.5 \times 10^{-4}$ , \*\*\*\*  $p < 2.5 \times 10^{-5}$ .

A

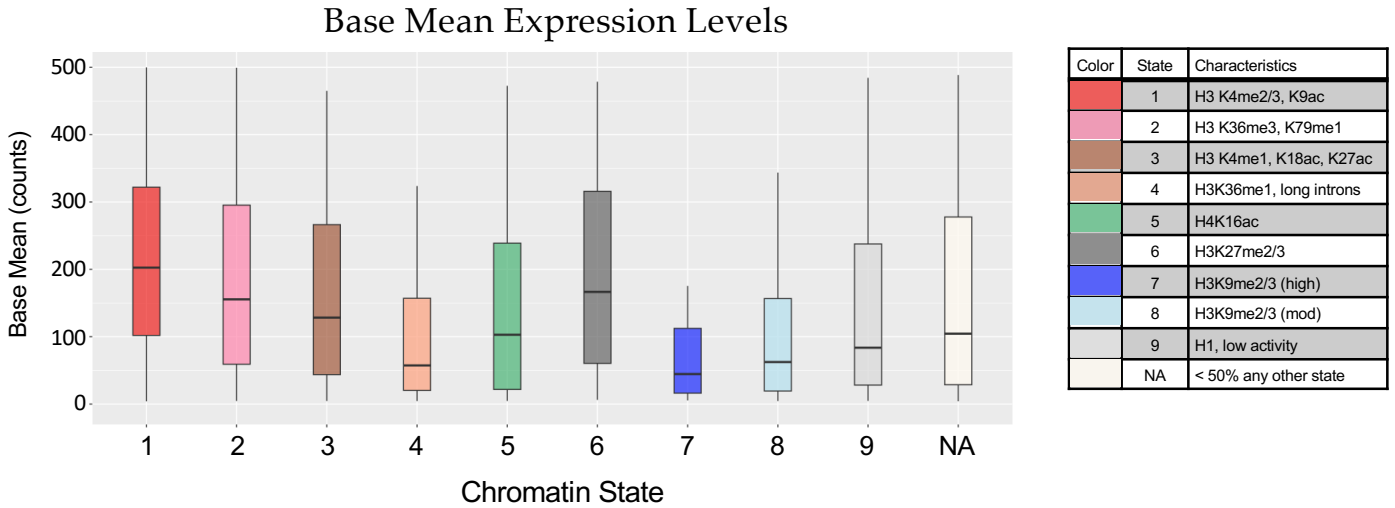

B

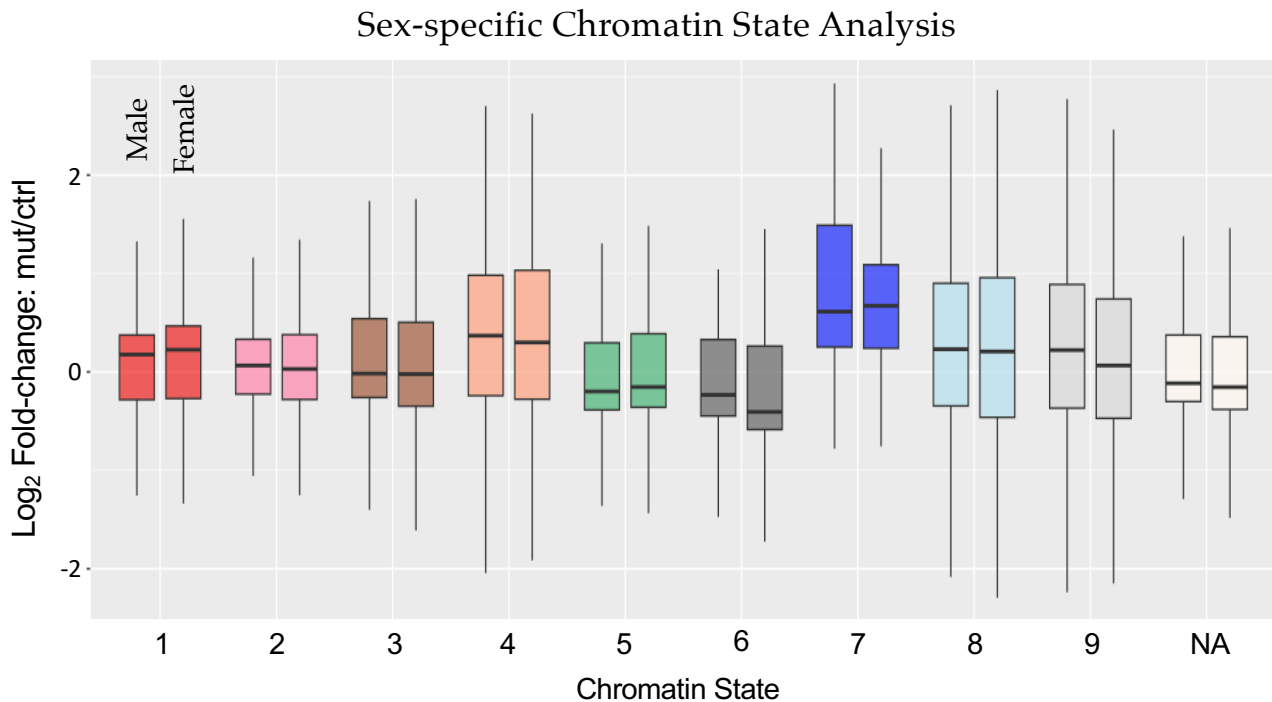

**Figure S4. Additional Chromatin State Analyses.** A) The Base Mean gene expression for all genotypes in the non-interaction DESeq2 model was plotted for genes, and binned as in Figure 5A. B) For the set of genes described in Figure 5A, and utilizing a DESeq2 model which considers sex as an additional variable (Fig. S2), separate mut/ctrl Log<sub>2</sub> Fold-change values were plotted for Old K36R male and female animals.

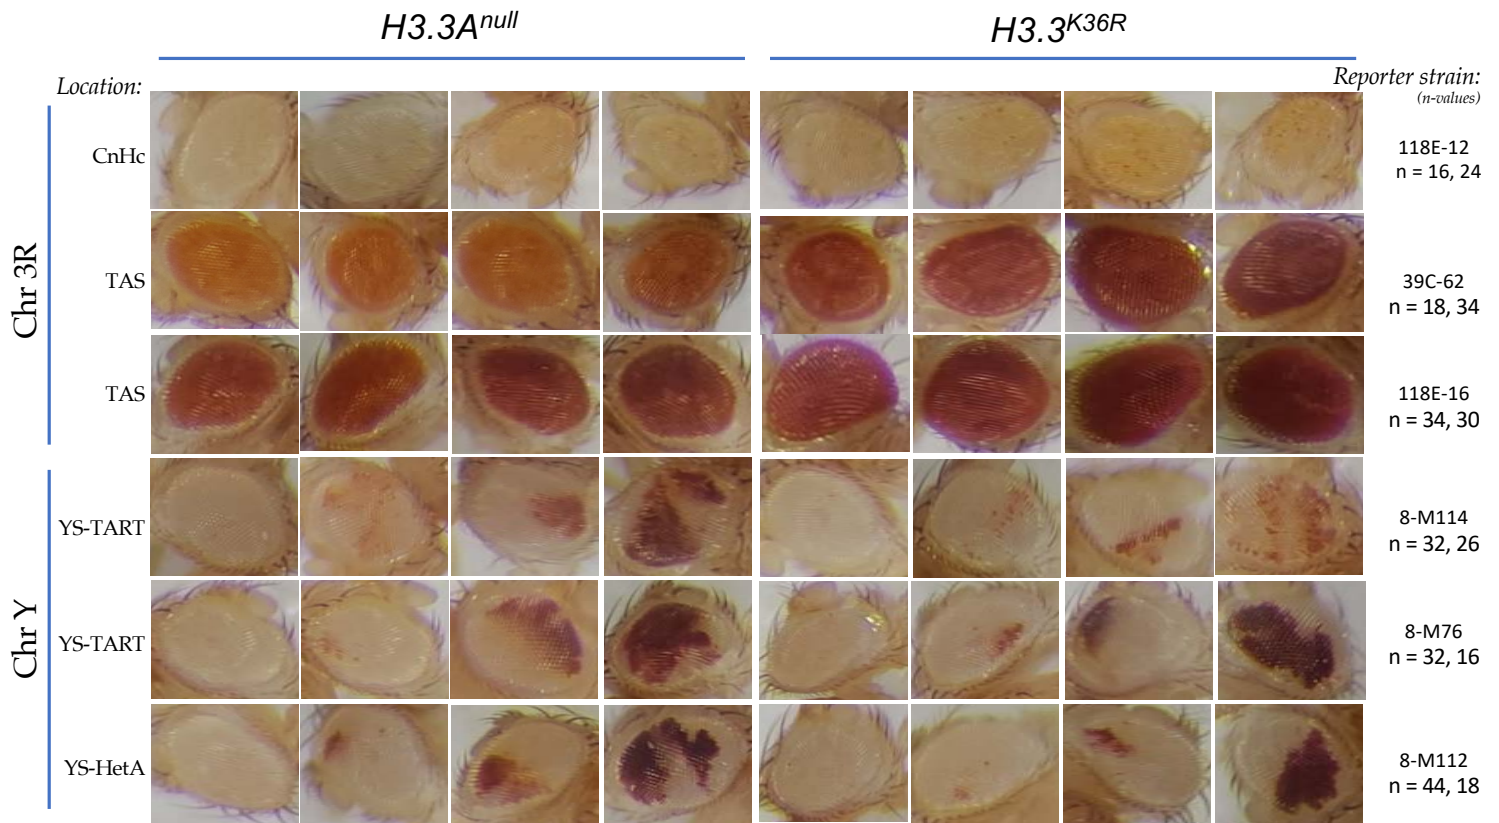

**Figure S5. Representative eyes from Position Effect Reporter strains.** For each row, four representative eyes for a particular reporter transgene in either the *H3.3A<sup>null</sup>* control or *H3.3<sup>K36R</sup>* mutant background are shown. To the left, chromosomal location and type of chromatin region where each reporter insertion is located is indicated. Pericentric heterochromatin (CnHc), Telomere Associated Sequences (TAS), YS-TART (Y chromosome TART), and YS-HetA (Y chromosome-HetA) are abbreviated as indicated. The number (n) of eyes evaluated per *H3.3A<sup>null</sup>* control (ctrl) and *H3.3<sup>K36R</sup>* mutant (mut) genotype are indicated at right, below the label for each reporter strain and also listed here: 118E-12 (ctrl=16, mut=24), 39C-62 (ctrl=18, mut=34), 118E-16 (ctrl=30, mut=22), 8-M114 (ctrl=32, mut=26), 8-M76 (ctrl=32, mut=16), 8-M112 (ctrl=44, mut=18).
